# Supplementary material for: Group A Streptococcus Infection in Neonatal Population: A Systematic Review of The Literature
Source: MDPI journal article supplement (doi:10.3390/jcm12226974), 2023-11-08
Supplement: s1 [file s1]

**Supplementary Table S1.** Studies included EOS neonatal cases with of iGAS.

| First author, publication year | Study type          | Pa-<br>tients<br>(N) | Gesta-<br>tional<br>Age<br>(weeks) | Birth<br>weight<br>(g) | Origin           | Gen-<br>der | Mode<br>of De-<br>livery  | Length<br>of<br>Rup-<br>ture of<br>Mem-<br>branes<br>(hours) | Maternal<br>symptoms             | Ma-<br>ternal<br>GAS<br>posi-<br>tive<br>Cul-<br>tures | Neonatal<br>positive<br>cultures                            | Maternal<br>Peripar-<br>tum Anti-<br>biotics | Clinical<br>manifesta-<br>tions           | Diag-<br>nosis               | Microor-<br>gan-<br>ism(Strep<br>A emm<br>strains) | Complica-<br>tions                                                                                                                                                                                | Type of<br>treatment                           | Treatmnt<br>duration<br>(days) | Neo-<br>natal<br>out-<br>come |
|--------------------------------|---------------------|----------------------|------------------------------------|------------------------|------------------|-------------|---------------------------|--------------------------------------------------------------|----------------------------------|--------------------------------------------------------|-------------------------------------------------------------|----------------------------------------------|-------------------------------------------|------------------------------|----------------------------------------------------|---------------------------------------------------------------------------------------------------------------------------------------------------------------------------------------------------|------------------------------------------------|--------------------------------|-------------------------------|
| Middleton, 2014 [1]            |                     | 1                    | 33                                 | 1910                   | Nether-<br>lands | Male        | N/R                       | N/R                                                          | None                             | N/R                                                    | Skin, um-<br>bilicus,<br>ear,<br>blood,<br>pleural<br>fluid | N/R                                          | Respiratory<br>distress, hy-<br>potension | Sepsis,<br>pneu-<br>monia    | N/R                                                | N/R                                                                                                                                                                                               | Penicillin                                     | N/R                            | Death                         |
| Crum, 2002 [2]                 | Case<br>re-<br>port | 1                    | 34                                 | 2216                   | USA              | N/R         | Cae-<br>sarean<br>section | 0                                                            | Toxic shock<br>syndrome<br>(TSS) | Vagi-<br>nal                                           | N/A                                                         | gentami-<br>cin,<br>clindamy-<br>cin         | Cardiorespir-<br>atory failure            | respira-<br>tory<br>distress | N/R                                                | Stage III<br>hypoxic<br>brain dam-<br>age due to<br>asphyxia<br>at deliv-<br>ery, grade<br>IV intra-<br>ventricular<br>hemor-<br>rhage, hy-<br>drocephala-<br>lus, and<br>brainstem<br>herniation | Ampicillin<br>and cefo-<br>taxime              | N/R                            | Death                         |
| Mahieu, 1995 [3]               | Case<br>re-<br>port | 1                    | 35                                 | N/R                    | Belgium          | Male        | Vagi-<br>nal              | 19                                                           | Tenderness<br>of uterus          | Pla-<br>centa,<br>um-<br>bilical                       | Blood,<br>bullae                                            | Penicillin                                   | Grunting,<br>apnea, de-<br>creased feed-  | TSS                          | M1, T1,<br>SOR-                                    | Skin ne-<br>crosis and<br>formation<br>of bullae,                                                                                                                                                 | Ampicillin,<br>netilmycin<br>→ penicil-<br>lin | 21 days                        | Good                          |

|                   |                |   |    |      |                  |             |     |     |                                        |                                                                 |                                                        |     |                                                                                                                                |                           |                                                                         |                    |                                              |     |       |
|-------------------|----------------|---|----|------|------------------|-------------|-----|-----|----------------------------------------|-----------------------------------------------------------------|--------------------------------------------------------|-----|--------------------------------------------------------------------------------------------------------------------------------|---------------------------|-------------------------------------------------------------------------|--------------------|----------------------------------------------|-----|-------|
|                   |                |   |    |      |                  |             |     |     |                                        | cord,<br>cer-<br>vix,<br>and<br>amni-<br>otic<br>mem-<br>branes |                                                        |     | ing, brady-<br>cardia, oligu-<br>ria, hypoten-<br>sion, respira-<br>tory distress                                              |                           | cranial cel-<br>lulitis, su-<br>perior<br>vena cava<br>obstruc-<br>tion |                    |                                              |     |       |
| Nieburg, 1975 [4] | Case<br>series | 1 | 36 | 2155 | USA              | Fe-<br>male | N/R | 4,5 | Leucorrhea                             | Blood,<br>and<br>lochia                                         | Blood,<br>urine                                        | N/R | Respiratory<br>distress, pul-<br>monary<br>hemorrhage,<br>circulatory<br>collapse, bi-<br>lateral ad-<br>renal hemor-<br>rhage | sepsis                    | emm<br>type 12                                                          | N/R                | N/R                                          | N/R | Death |
|                   |                | 1 | 36 | 2600 | USA              | Male        | N/R | 4,5 | Fever, pelvic<br>thrombo-<br>phlebitis | Blood                                                           | Blood                                                  | N/R | Respiratory<br>distress, pul-<br>monary<br>hemorrhage,<br>circulatory<br>collapse, bi-<br>lateral ad-<br>renal hemor-<br>rhage | sepsis                    | emm<br>type 12                                                          | N/R                | N/R                                          | N/R | Death |
|                   |                | 1 | 38 | 3755 | Nether-<br>lands | Fe-<br>male | N/R | N/R | Puerperal<br>sepsis                    | N/R                                                             | Skin, ear,<br>eye, um-<br>bilicus,<br>naso-<br>pharynx | N/R | Fever, con-<br>junctivitis,<br>respiratory<br>distress, hy-<br>potension                                                       | Sepsis,<br>pneu-<br>monia | N/R                                                                     | N/R                | Penicillin                                   | N/R | Good  |
| Lequier 1998 [5]  | Case<br>series | 1 | 38 | 2480 | USA              | Fe-<br>male | N/R | N/R | N/R                                    | Vagi-<br>nal<br>and<br>blood                                    | Blood                                                  | N/R | Pale and le-<br>thargic                                                                                                        | sepsis,<br>empy-<br>ema   | emm<br>type 1                                                           | Pleural<br>empyema | Penicillin,<br>empyema<br>decortica-<br>tion | N/R | Good  |

|                            |             |   |    |      |             |        |                   |     |                  |                          |                                            |     |                                                             |                                  |            |     |                                       |         |      |
|----------------------------|-------------|---|----|------|-------------|--------|-------------------|-----|------------------|--------------------------|--------------------------------------------|-----|-------------------------------------------------------------|----------------------------------|------------|-----|---------------------------------------|---------|------|
|                            |             | 1 | 39 | 3775 | Netherlands | Male   | N/R               | N/R | TSLs             | N/R                      | Skin, nasopharynx, umbilicus, blood        | N/R | Respiratory distress, hypotension, skin rash                | toxic shock-like syndrome (TSLs) | N/R        | N/R | Penicillin, clindamycin               | N/R     | Good |
| Shinoda, 2020 [6]          | Case series | 1 | 39 | 3158 | Japan       | Female | Vaginal           | N/R | N/R              | blood                    | Blood, skin swabs, and cerebrospinal fluid | N/R | Fever                                                       | sepsis, meningitis               | emm 80     | N/R | Ampicillin, cefotaxime, and acyclovir | 14 days | Good |
|                            |             | 1 | 39 | N/R  | UK          | Male   | Caesarean section | N/R | Fever            | Uterine cavity, placenta | Blood, umbilicus                           | N/R | Drowsy, jaundiced, fever, abdominal erythema and distension | sepsis                           | N/R        | N/R | N/R                                   | N/R     | Good |
| Verboon-Macielek, 2000 [7] |             | 1 | 40 | 3150 | Netherlands | Male   | N/R               | N/R | Pharyngitis      | N/R                      | Umbilicus, ascites fluid                   | N/R | Poor feeding, vomiting, distended abdomen, bloody stools    | Peritonitis                      | N/R        | N/R | Penicillin, laparotomy                | N/R     | Good |
|                            |             | 1 | 40 | 3680 | Netherlands | Male   | N/R               | N/R | Puerperal sepsis | N/R                      | Skin, ear, umbilicus, nasopharynx, blood   | N/R | Fever, skin rash, respiratory distress, hypotension         | TSLs                             | N/R        | N/R | Penicillin, clindamycin               | N/R     | Good |
| Nohara, 2014 [8]           | Case series | 1 | 40 | 3144 | Japan       | Female | Vaginal           | N/R | N/R              | Vaginal                  | Throat, skin, head empyema, pleural fluid  | N/R | Small empyema on the head, respiratory distress             | pleural empyema                  | emm type 6 | N/R | Ampicillin and cefotaxime             | 11      | Good |
|                            |             | 1 | 40 | N/R  | UK          | Male   | Vaginal           | N/R | Sepsis           | N/R                      | Blood, scalp wound swab,                   | N/R | Infected scalp wound,                                       | sepsis                           | N/R        | N/R | N/R                                   | N/R     | Good |

|                            |                     |   |      |      |                |             |              |        |                   |     | umbili-<br>cus, nose,<br>throat                                     |                  | cellulitis, oe-<br>dema, gener-<br>alised rash                                                 |                                                                                                                 |                                                  |               |                                                                              |                                                                                                                |         |       |
|----------------------------|---------------------|---|------|------|----------------|-------------|--------------|--------|-------------------|-----|---------------------------------------------------------------------|------------------|------------------------------------------------------------------------------------------------|-----------------------------------------------------------------------------------------------------------------|--------------------------------------------------|---------------|------------------------------------------------------------------------------|----------------------------------------------------------------------------------------------------------------|---------|-------|
| Miyairi, 2004 [9]          | Case<br>re-<br>port | 1 | term | 4800 | USA            | N/R         | Vagi-<br>nal | 12     | N/R               | N/R | blood                                                               | N/R              | Cardiorespir-<br>atory arrest                                                                  | sepsis                                                                                                          | N/R                                              | N/R           | Ampicillin ,<br>gentamicin                                                   | N/R                                                                                                            | Death   |       |
| Nutman, 1979 [10]          | Case<br>re-<br>port | 1 | term | 2700 | Israel         | Fe-<br>male | Vagi-<br>nal | 14     | N/R               |     | Nose,<br>cervix skin, CSF,<br>blood                                 | N/R              | Erythema-<br>tous lesion<br>was ob-<br>served on the<br>right cheek,<br>poor feeding,<br>fever | sepsis,<br>menin-<br>gitis                                                                                      | type M52                                         | N/R           | Penicillin,<br>gentamicin,<br>and chlo-<br>rampheni-<br>col→ peni-<br>cillin | N/R                                                                                                            | Good    |       |
| Thaarup, 1997 [11]         | Case<br>re-<br>port | 1 | term | 3325 | Den-<br>mark   | Fe-<br>male | N/R          | 30 min | fever             |     | blood,<br>cervix<br>and an in-<br>fected peri-<br>neal rup-<br>ture | Pleural<br>fluid | N/R                                                                                            | Tachypnea,<br>costal retrac-<br>tions,<br>grunting and<br>peripheral<br>cyanosis                                | Pleural<br>empy-<br>ema                          | N/R           | N/R                                                                          | Ampicillin<br>and<br>netilmicin<br>→ Penicil-<br>lin and<br>netilmicin<br>→ ceftriax-<br>one and<br>netilmicin | 28 days | Good  |
| Ross, 2021 [12]            | Case<br>re-<br>port | 1 | N/R  | N/R  | Aus-<br>tralia | N/R         | Vagi-<br>nal | N/R    | Abdominal<br>pain |     | Vagi-<br>nal,<br>breast<br>milk                                     |                  | N/R                                                                                            | Tachypnoea<br>and grunt-<br>ing, subga-<br>leal haemor-<br>rhage, hae-<br>modynamic<br>instability<br>and fever | Sepsis                                           | N/R           | N/R                                                                          | Ampicillin,<br>gentamicin<br>and cefo-<br>taxime →<br>ampicillin                                               | 14 days | Good  |
| Sakata, 2013, 2014 [13,14] | Case<br>series      | 1 | N/R  | N/R  | Japan          | Fe-<br>male | N/R          | N/R    |                   |     | N/R                                                                 | Pleural<br>fluid | N/R                                                                                            | N/R                                                                                                             | Pyotho-<br>rax                                   | emm<br>type 6 | N/R                                                                          | Ampicillin                                                                                                     | N/R     | Good  |
| Timmis 2010 [15]           | Case<br>series      | 1 | N/R  | N/R  | UK             | Male        | N/R          | N/R    |                   |     | N/R                                                                 | Blood            | N/R                                                                                            | N/R                                                                                                             | Definite<br>strepto-<br>coccal<br>toxic<br>shock | N/R           | N/R                                                                          | Cefotaxime<br>gentamicin<br>benzylpeni-<br>cillin                                                              | N/R     | Death |

syn-  
drom  
(DSTSS)

**Supplementary Table S2.** Studies included LOS neonatal cases with of iGAS.

| First author, publication year | Study type     | Pa-<br>tients<br>(N) | Gesta-<br>tional Age<br>(weeks) | Birth<br>weight<br>(g) | Origin         | Gender | Mode<br>of De-<br>livery | Length<br>of Rup-<br>ture of Mem-<br>branes<br>(hours) | Maternal<br>symp-<br>toms | Maternal<br>GAS posi-<br>tive Cul-<br>tures | Neonatal<br>positive<br>cultures | Clinical<br>manifes-<br>tations                                                                                                                                                                            | Diagno-<br>sis | Microor-<br>gan-<br>ism(Strep<br>A emm<br>strains) | Com-<br>plica-<br>tions | Type of<br>treatment                                                                                                                                                              | Treat-<br>ment<br>dura-<br>tion<br>(days) | Neonatal<br>outcome |
|--------------------------------|----------------|----------------------|---------------------------------|------------------------|----------------|--------|--------------------------|--------------------------------------------------------|---------------------------|---------------------------------------------|----------------------------------|------------------------------------------------------------------------------------------------------------------------------------------------------------------------------------------------------------|----------------|----------------------------------------------------|-------------------------|-----------------------------------------------------------------------------------------------------------------------------------------------------------------------------------|-------------------------------------------|---------------------|
| Middleton, 2014 [1]            | Case<br>series | 1                    | 30                              | N/R                    | Aus-<br>tralia | Female | N/R                      | N/R                                                    | N/R                       | N/R                                         | Peritoneal<br>Fluid              | Hypo-<br>thermia,<br>tachycar-<br>dia, tach-<br>ypnoea,<br>grunting,<br>hypoxia,<br>hypoten-<br>sion, cool<br>peripher-<br>ies,<br>sunken<br>fonta-<br>nelle, ab-<br>dominal<br>disten-<br>sion,<br>bruish | TSLS           | N/R                                                | N/R                     | Ceftriaxone,<br>gentamicin,<br>metronida-<br>zole → pipe-<br>racillin-tazo-<br>bactam, ex-<br>ploratory<br>laparotomy,<br>surgical deb-<br>ridement of<br>the area of<br>necrosis | 14                                        | Good                |
|                                |                | 1                    | 30                              | N/R                    | Aus-<br>tralia | Female | N/R                      | N/R                                                    | N/R                       | N/R                                         | Blood                            | Cough,<br>lethargy,<br>de-<br>creased                                                                                                                                                                      | Sepsis         | N/R                                                | N/R                     | Ceftriaxone<br>and flucloxa-<br>cillin → pip-<br>eracillin-                                                                                                                       | 14                                        | Good                |

|                   |             |   |    |      |             |        |         |          |      |     |                    |                                                                                                                       |                           |                  |     |                                                                       |     |       |
|-------------------|-------------|---|----|------|-------------|--------|---------|----------|------|-----|--------------------|-----------------------------------------------------------------------------------------------------------------------|---------------------------|------------------|-----|-----------------------------------------------------------------------|-----|-------|
|                   |             |   |    |      |             |        |         |          |      |     |                    | oral intake, hypothermia, hypoxia, poor peripheral perfusion, increased tissue turgor, sunken fontanelle, hypotension |                           |                  |     | tazobactam, vancomycin, azithromycin and oseltamivir→benzylpenicillin |     |       |
| Barnham 2001 [16] | Case series | 1 | 35 | N/R  | UK          | Male   | Vaginal | 27 hours | N/R  | N/R | Blood              | Dusky, floppy, lethargy                                                                                               | sepsis                    | N/R              | N/R | N/R                                                                   | N/R | Good  |
|                   |             | 1 | 36 | 2550 | Netherlands | Male   | N/R     | N/R      | None | N/R | CSF, brain abscess | Fever, poor feeding, full anterior fontanelle, seizures                                                               | Meningitis, brain abscess | N/R              | N/R | Penicillin                                                            | N/R | Death |
| Ventura 2019 [17] | Case report | 1 | 36 | N/R  | Portugal    | Female | Vaginal | 3 hours  | N/R  | N/R | Blood              | Feeding refusal and hyporeactivity, dry mucous membranes, depressed anterior                                          | Sepsis                    | emm type STG7882 | N/R | Cefotaxime, ampicillin,                                               | N/R | Good  |

|                            |                     |   |    |      |                       |      |                                |     |      |     |                                     |                                                                                                                                                               |                  |               |                                       |                                                  |            |       |
|----------------------------|---------------------|---|----|------|-----------------------|------|--------------------------------|-----|------|-----|-------------------------------------|---------------------------------------------------------------------------------------------------------------------------------------------------------------|------------------|---------------|---------------------------------------|--------------------------------------------------|------------|-------|
|                            |                     |   |    |      |                       |      |                                |     |      |     |                                     | fonta-<br>nelle, and<br>weight<br>loss                                                                                                                        |                  |               |                                       |                                                  |            |       |
| Saito, 2017 [18]           | Case<br>re-<br>port | 1 | 37 | N/R  | UK                    | Male | Vagi-<br>nal                   | N/R | N/R  | N/R | Blood                               | Poor<br>feeding,<br>irritabil-<br>ity, vom-<br>iting,<br>loose<br>stool and<br>fever, ery-<br>thema<br>in umbili-<br>cus, tach-<br>ypnea,<br>tachycar-<br>dia | Sepsis           | emm<br>st28.0 | N/R                                   | Cefotaxime<br>and amoxi-<br>cillin               | 14<br>days | Good  |
| Huber, 2014 [19]           | Case<br>re-<br>port | 1 | 39 | N/R  | Ger-<br>many          | Male | Cae-<br>sarean<br>sec-<br>tion | N/R | N/R  | N/R | Blood                               | Fever,<br>lethargy<br>and poor<br>feed-<br>ing, irrita-<br>bility,<br>pallor and<br>mottling                                                                  | sepsis           | N/R           | Celluli-<br>tis-Ad-<br>enitis         | Ampicillin<br>and gen-<br>tamicin                | 14<br>days | Good  |
| Verboon-Macielek, 2000 [7] | Case<br>series      | 7 | 40 | 3350 | Neth-<br>er-<br>lands | Male | N/R                            | N/R | None | N/R | Umbili-<br>cus,<br>ascites<br>fluid | Poor<br>feeding,<br>vomit-<br>ing, dis-<br>tended<br>abdomen,<br>omphali-<br>tis                                                                              | Peritoni-<br>tis | N/R           | N/R                                   | Penicillin,<br>peritoneal<br>puncture            | N/R        | Good  |
| Bhutta, 1990 [20]          | Case<br>series      | 1 | 40 | 3000 | Paki-<br>stan         | Male | N/R                            | N/R | N/R  | N/R | Blood                               | Fever,<br>poor<br>feeding,                                                                                                                                    | sepsis           | N/R           | Cardi-<br>orespir-<br>atory<br>arrest | Cefotax-<br>ime, amika-<br>cin, cloxacil-<br>lin | N/R        | Death |

|                     |                      |   |      |      |          |        |     |     |     |     |                                |                                                                                                  |        |     |                                                                         |                                                                                                                     |     |       |
|---------------------|----------------------|---|------|------|----------|--------|-----|-----|-----|-----|--------------------------------|--------------------------------------------------------------------------------------------------|--------|-----|-------------------------------------------------------------------------|---------------------------------------------------------------------------------------------------------------------|-----|-------|
| Campbell, 1996 [21] | Retrospective cohort |   |      |      |          |        |     |     |     |     |                                |                                                                                                  |        |     |                                                                         |                                                                                                                     |     |       |
|                     |                      | 1 | N/R  | N/R  | Pakistan | Female | N/R | N/R | N/R | N/R | Blood and pus from the lesions | respiratory difficulty<br>Lethargy, 2 vesicular lesions in the left axilla and antecubital fossa | sepsis | N/R | N/R                                                                     | No treatment                                                                                                        | N/R | Good  |
|                     |                      | 1 | term | 2800 | Pakistan | Male   | N/R | N/R | N/R | N/R | Blood                          | Icteric, periorbital oedema, vomiting, necrotic umbilicus                                        | sepsis | N/R | Cardiorespiratory arrest                                                | Cefotaxime, amikacin, cloxacillin                                                                                   | N/R | Death |
|                     |                      | 1 | 26   | 920  | USA      | N/R    | N/R | N/R | N/R | N/R | Blood and throat               | Apnea and poor perfusion                                                                         | Sepsis | N/R | N/R                                                                     | Ben-zathine penicillin G intramuscularly, intravenous clindamycin                                                   | 14  | Good  |
|                     |                      | 1 | 28   | 560  | USA      | N/R    | N/R | N/R | N/R | N/R | Blood                          | Apnea, bradycardia, hypotension, and toxic shock-like syndrome, necrotic scalp lesion            | Sepsis | N/R | Seven days later, he had apnea, shock, neutropenia, disseminated intra- | 14-day course of penicillin G (200,000 units/kg per day) and also received a single dose of benzathine penicillin G | 14  | Death |



|                        |                     |   |      |      |              |      |              |     |     |     |       |                                                                                                                                    |        |            |                                                                                                                                                                          |                                                                  |            |      |
|------------------------|---------------------|---|------|------|--------------|------|--------------|-----|-----|-----|-------|------------------------------------------------------------------------------------------------------------------------------------|--------|------------|--------------------------------------------------------------------------------------------------------------------------------------------------------------------------|------------------------------------------------------------------|------------|------|
|                        |                     |   |      |      |              |      |              |     |     |     |       |                                                                                                                                    |        |            | vascu-<br>lar co-<br>ag-<br>ulopa-<br>thy,<br>and,ne-<br>crotiz-<br>ing cel-<br>lulitis<br>of the<br>right<br>ear and<br>scalp<br>extend-<br>ing to<br>the oc-<br>ciput. | (50,000<br>units/kg)                                             |            |      |
| Wilschanski, 1989 [22] | Case<br>re-<br>port | 1 | term | N/R  | Israel       | Male | Vagi-<br>nal | N/R | N/R | N/R | Blood | Fever,<br>poor<br>feeding,<br>erythem-<br>atous<br>rash in<br>right cer-<br>vix + pe-<br>riorbital<br>edema,<br>focal sei-<br>zure | Sepsis | 3/13/B3264 | N/R                                                                                                                                                                      | Gentamicin,<br>cefuroxime<br>and<br>ampicillin →<br>Penicillin G | 12<br>days | Good |
| Cartwright, 1977 [23]  | Case<br>re-<br>port | 1 | term | 4080 | Eng-<br>land | Male | Vagi-<br>nal | N/R | N/R | N/R | Blood | Erythem-<br>atous le-<br>sion,<br>swollen<br>cheek, oe-<br>dematous<br>eye                                                         | Sepsis | N/R        | N/R                                                                                                                                                                      | Penicillin,<br>hydrocorti-<br>sone                               | 14         | Good |

|                    |               |   |         |      |               |        |                     |            |                        |              |                                                                 |                                                                                                              |                           |               |                 |                                                                           |         |       |
|--------------------|---------------|---|---------|------|---------------|--------|---------------------|------------|------------------------|--------------|-----------------------------------------------------------------|--------------------------------------------------------------------------------------------------------------|---------------------------|---------------|-----------------|---------------------------------------------------------------------------|---------|-------|
| Barnham, 1989 [24] | co-hort study | 1 | preterm | N/R  | UK            | Male   | N/R                 | Pro-longed | N/R                    | N/R          | Blood                                                           | Jaundice, sepsis                                                                                             | Sepsis                    | N/R           | N/R             | N/R                                                                       | N/R     | Good  |
| Umadevi, 2013 [25] | Case re-port  | 1 | term    | 3200 | Neth-er-lands | Male   | Cae-sarean sec-tion | N/R        | N/R                    | N/R          | Arthritic fluid                                                 | Swelling on his right el-bow and reduced move-ments of the right forearm                                     | septic ar-thritis, sepsis | N/R           | N/R             | Ampicillin, cloxacillin and amika-cin → Oral ampicillin and erythro-mycin | 10 days | Good  |
| Coulter, 1984 [26] | Case series   | 1 | term    | N/R  | UK            | Female | N/R                 | N/R        | N/R                    | N/R          | Blood, CSF, and umbilicus                                       | Snuffles, irritabil-ity, poor feeding, bleeding from the tongue, and a transient rash on the face and trunk. | sepsis, meningi-tis       | N/R           | N/R             | Penicillin, cefuroxime                                                    | N/R     | Death |
|                    |               | 1 | term    | N/R  | UK            | Male   | N/R                 | N/R        | N/R                    | Vaginal swab | CSF, paronych-iae, um-bilicus, nose, and nasogas-tric aspi-rate | Fever, opis-thoto-nous, sei-zures, fontanelle disten-sion.                                                   | meningi-tis               | N/R           | Hydro-cepha-lus | Gentamicin and cefurox-ime → peni-cillin                                  | N/R     | Good  |
| Martic, 2010 [27]  | Case re-port  | 1 | N/R     | N/R  | Serbia        | Male   | N/R                 | N/R        | superfi-cial pyo-derma | Skin         | Blood                                                           | Fever , lethargy, poor feeding, erythema                                                                     | sepsis                    | emm type 53.2 | N/R             | Vancomycin, amikacin → penicillin G                                       | N/R     | Good  |

|                            |             |   |     |     |        |        |                   |     |                                   |         |                         |                                                                    |                                      |               |     |                           |         |      |
|----------------------------|-------------|---|-----|-----|--------|--------|-------------------|-----|-----------------------------------|---------|-------------------------|--------------------------------------------------------------------|--------------------------------------|---------------|-----|---------------------------|---------|------|
| Sakata, 2013, 2014 [13,14] | Case series | 1 | N/R | N/R | Japan  | Female | N/R               | N/R |                                   | N/R     | Blood                   | N/R                                                                | Sepsis                               | emm type 1    | N/R | Ampicillin                | N/R     | Good |
|                            |             | 1 | N/R | N/R | Japan  | Male   | N/R               | N/R |                                   | N/R     | Blood                   | N/R                                                                | Sepsis                               | emm type 1    | N/R | Ampicillin                | N/R     | Good |
|                            |             | 1 | N/R | N/R | Japan  | Female | N/R               | N/R |                                   | N/R     | Blood                   | N/R                                                                | sepsis ,<br>necrotizing<br>fasciitis | N/R           | N/R | N/R                       | N/R     | N/R  |
| Santos, 2009 [28]          | Case series | 1 | N/R | N/R | Brazil | Female | N/R               | N/R |                                   | N/R     | CSF                     | N/R                                                                | meningitis                           | emm type 39,1 | N/R | N/R                       | N/R     | N/R  |
|                            |             | 1 | N/R | N/R | Brazil | Female | N/R               | N/R |                                   | N/R     | CSF                     | N/R                                                                | meningitis                           | emm type 92   | N/R | N/R                       | N/R     | N/R  |
| Shanks, 1986 [29]          | Case report | 1 | N/R | N/R | USA    | Male   | Caesarean section | N/R | Fever, chills, vaginal hemorrhage | Vaginal | Tunica vaginalis pus    | Irritability, scrotal swelling, fever, yellow exudate of umbilicus | hydrocele infection                  | N/R           | N/R | Nafcillin, gentamycin     | N/R     | Good |
|                            |             |   |     |     |        |        |                   |     |                                   |         |                         |                                                                    |                                      |               |     |                           |         |      |
| Torres-Martinez 1992 [30]  | Case series | 1 | N/R | N/R | UK     | Female | N/R               | N/R |                                   | N/R     | Blood, peritoneal fluid | Fever, rash, abdominal distension, hypotension, shock              | Peritonitis, sepsis                  | N/R           | N/R | Penicillin                | 14 days | Good |
| Givner, 1991 [31]          | Case series | 1 | N/R | N/R | Canada | Female | N/R               | N/R |                                   | N/R     | Blood                   | N/R                                                                | Sepsis, osteomyelitis                | N/R           | N/R | N/R                       | N/R     | N/R  |
| Johnson, 1990 [32]         | Case report | 1 | N/R | N/R | USA    | N/R    | N/R               | N/R |                                   | N/R     | Blood                   | N/R                                                                | sepsis                               | N/R           | N/R | N/R                       | N/R     | Good |
| Lehtonen, 1987 [33]        | Case series | 1 | N/R | N/R | Turkey | Female | N/R               | N/R |                                   | N/R     | Blood                   | Febrile , irritable, lethargic,                                    | sepsis                               | N/R           | N/R | Metronidazole-cephalothin | N/R     | Good |

|                    |                                       |    |     |     |             |        |                                                                               |     |  |     |                                        |                                                                                                                                                             |        |     |     |                                     |     |      |
|--------------------|---------------------------------------|----|-----|-----|-------------|--------|-------------------------------------------------------------------------------|-----|--|-----|----------------------------------------|-------------------------------------------------------------------------------------------------------------------------------------------------------------|--------|-----|-----|-------------------------------------|-----|------|
|                    |                                       |    |     |     |             |        |                                                                               |     |  |     | abdomen<br>disten-<br>sion and<br>rash |                                                                                                                                                             |        |     |     |                                     |     |      |
|                    |                                       | 1  | N/R | N/R | Tur-<br>key | Female | N/R                                                                           | N/R |  | N/R | Blood                                  | Fever,ir-<br>ritable,<br>lethargic,<br>abdomen<br>disten-<br>sion and<br>rash                                                                               | sepsis | N/R | N/R | Metronida-<br>zole-cepha-<br>lothin | N/R | Good |
| Leonard, 2019 [34] | Ret-<br>ro-<br>spec-<br>tive<br>study | 12 | N/R | N/R | UK          | N/R    | 4 cae-<br>sarean<br>sec-<br>tion,3<br>vagi-<br>nal<br>deliv-<br>ery, 5<br>N/R | N/R |  | N/R | Blood                                  | 5 fever, 2<br>respira-<br>tory dis-<br>tress , 2<br>infections<br>of the<br>umbilicus<br>or ear, 1<br>hypoxic<br>ischaemic<br>encepha-<br>lopathy, 2<br>N/R | sepsis | N/R | N/R | N/R                                 | N/R | Good |

**Supplementary Table S3.** Studies included neonatal cases of iGAS with no data regarding the time of disease onset.

| First author, publication year | Study type | Pa-<br>tients<br>(N) | Gesta-<br>tional<br>Age<br>(weeks) | Birth<br>weight<br>(g) | Origin | Gen-<br>der | Mode<br>of De-<br>livery | Length<br>of Rup-<br>ture of<br>Mem-<br>branes<br>(hours) | Maternal<br>symptoms | Mater-<br>nal GAS<br>positive<br>Cultures | Neona-<br>tal posi-<br>tive cul-<br>tures | Maternal<br>peripar-<br>tum anti-<br>biotics | Clinical<br>mani-<br>festa-<br>tions | Diagno-<br>sis | Microor-<br>gan-<br>ism(Strep<br>A emm<br>strains) | Compli-<br>cations | Type of<br>treatment | Ttreat-<br>ment du-<br>ration<br>(days) | Neonatal<br>Outcome |
|--------------------------------|------------|----------------------|------------------------------------|------------------------|--------|-------------|--------------------------|-----------------------------------------------------------|----------------------|-------------------------------------------|-------------------------------------------|----------------------------------------------|--------------------------------------|----------------|----------------------------------------------------|--------------------|----------------------|-----------------------------------------|---------------------|
|--------------------------------|------------|----------------------|------------------------------------|------------------------|--------|-------------|--------------------------|-----------------------------------------------------------|----------------------|-------------------------------------------|-------------------------------------------|----------------------------------------------|--------------------------------------|----------------|----------------------------------------------------|--------------------|----------------------|-----------------------------------------|---------------------|

|                         |                |   |      |      |          |        |         |         |                                                |         |                                           |           |                                                            |            |                            |                                                                                                                                                                                                                             |                                                                                |         |       |
|-------------------------|----------------|---|------|------|----------|--------|---------|---------|------------------------------------------------|---------|-------------------------------------------|-----------|------------------------------------------------------------|------------|----------------------------|-----------------------------------------------------------------------------------------------------------------------------------------------------------------------------------------------------------------------------|--------------------------------------------------------------------------------|---------|-------|
| Siti Hafsyah, 2021 [35] | Case re-report | 1 | 37   | 2460 | Malaysia | Female | Vaginal | N/R     | Vaginal itchiness and discharge, fever, chills | Vaginal | Peritoneal fluid, pleural fluid and blood | N/R       | Lethargic and grunting, cardiopulmonary arrest             | Sepsis     | N/R                        | N/R                                                                                                                                                                                                                         | N/R                                                                            | N/R     | Death |
| Davey 2006 [36]         | Case re-report | 1 | term | 3560 | Canada   | Female | vaginal | 4 hours |                                                | Vaginal | Skin cultures                             | Cefazolin | Fever, erythematous scalp lesion, irritable and fed poorly | Cellulitis | type M11<br>T non-typeable | Acute renal failure, respiratory distress syndrome, perforated necrotizing enterocolitis (requiring resection of necrotic bowel, a jejunos-tomy, and distal ileal mucous fistula), recurrent infections, failure to thrive, | Ampicillin, cefuroxime, → gentamicin, meropenem and clindamycin → penicillin G | 20 days | Good  |

|                    |                                  |    |     |     |         |             |     |     |  |     |                                                                                                                                                       |     |                                                                                                                                                                                                      |                            |     |     |     |     | and cho-<br>lestatic<br>jaundice |
|--------------------|----------------------------------|----|-----|-----|---------|-------------|-----|-----|--|-----|-------------------------------------------------------------------------------------------------------------------------------------------------------|-----|------------------------------------------------------------------------------------------------------------------------------------------------------------------------------------------------------|----------------------------|-----|-----|-----|-----|----------------------------------|
| Pius, 2016 [37]    | Original<br>arti-<br>cle         | 5  | N/R | N/R | Nigeria | N/R         | N/R | N/R |  | N/R | Blood                                                                                                                                                 | N/R | N/R                                                                                                                                                                                                  | Sepsis                     | N/R | N/R | N/R | N/R | 2 deaths                         |
| Wheeler, 1991 [38] | Case<br>series                   | 1  | N/R | N/R | USA     | Male        | N/R | N/R |  | N/R | N/R                                                                                                                                                   | N/R | N/R                                                                                                                                                                                                  | Pneumo-<br>nia             | N/R | N/R | N/R | N/R | Good                             |
|                    |                                  | 1  | N/R | N/R | USA     | Male        | N/R | N/R |  | N/R | CSF                                                                                                                                                   | N/R | N/R                                                                                                                                                                                                  | Meningi-<br>tis            | N/R | N/R | N/R | N/R | Good                             |
|                    |                                  | 1  | N/R | N/R | USA     | Male        | N/R | N/R |  | N/R | N/R                                                                                                                                                   | N/R | N/R                                                                                                                                                                                                  | Pneumo-<br>nia             | N/R | N/R | N/R | N/R | Good                             |
|                    |                                  | 1  | N/R | N/R | USA     | Fe-<br>male | N/R | N/R |  | N/R | N/R                                                                                                                                                   | N/R | N/R                                                                                                                                                                                                  | Pneumo-<br>nia             | N/R | N/R | N/R | N/R | Good                             |
|                    |                                  | 1  | N/R | N/R | USA     | Male        | N/R | N/R |  | N/R | Skin les-<br>sion                                                                                                                                     | N/R | N/R                                                                                                                                                                                                  | Cellulitis                 | N/R | N/R | N/R | N/R | N/R                              |
| Seale, 2016 [39]   | ob-<br>serva-<br>tional<br>study | 94 | N/R | N/R | Kenya   | N/R         | N/R | N/R |  | N/R | Blood,<br>(2.3%)<br>CSF,<br>(54.7%)<br>swab<br>sample<br>(wound,<br>skin<br>breach,<br>or pus),<br>(2.0%)<br>joint as-<br>pirates,<br>(1.5%)<br>urine | N/R | Skin or<br>soft tis-<br>sue in-<br>fection<br>(69.9%);<br>fol-<br>lowed<br>by se-<br>vere<br>pneu-<br>monia<br>in<br>(23.3%),<br>of which<br>(69%)<br>were<br>compli-<br>cated by<br>sepsis;<br>then | Sepsis,<br>meningi-<br>tis | N/R | N/R | N/R | N/R | 12.2% mor-<br>tality             |

---

bactere-  
mia  
without  
focus in  
(14.4%),  
(4.6%)  
bone  
and  
joint in-  
fections,  
(3.0%)  
menin-  
gitis,  
(1.6%)  
urinary  
tract in-  
fection,  
(0.5%)  
acute  
glomer-  
ulone-  
phritis,  
(0.3%)  
endocar-  
ditis,  
(0.3%)  
nonspe-  
cific  
ab-  
dominal  
signs,  
(0.3%)  
necrotiz-  
ing  
fasciitis.  
A  
total of  
(5.1%)

---

|                     |    |     |     |        |      |     |     |  |                  |                   |     |                                                                                     |                                             |     |     |                                         |     |      |
|---------------------|----|-----|-----|--------|------|-----|-----|--|------------------|-------------------|-----|-------------------------------------------------------------------------------------|---------------------------------------------|-----|-----|-----------------------------------------|-----|------|
|                     |    |     |     |        |      |     |     |  |                  |                   |     | met the<br>criteria<br>for<br>strepto-<br>coccal<br>toxic<br>shock<br>syn-<br>drome |                                             |     |     |                                         |     |      |
| Givner, 1991 [31]   | 1  | N/R | N/R | Canada | Male | N/R | N/R |  | Endo-<br>metrium | Blood             | N/R | N/R                                                                                 | Sepsis                                      | N/R | N/R | N/R                                     | N/R | N/R  |
| Lehtonen, 1987 [33] | 1  | N/R | N/R | Turkey | N/R  | N/R | N/R |  | N/R              | Skin les-<br>sion | N/R | N/R                                                                                 | Pyo-<br>derma                               | N/R | N/R | Metroni-<br>dazole-<br>cepha-<br>lothin | N/R | Good |
|                     | 1  | N/R | N/R | Turkey | N/R  | N/R | N/R |  | N/R              | Ompha-<br>lus     | N/R | N/R                                                                                 | Ompha-<br>litis and<br>conjunc-<br>tivitis. | N/R | N/R | Metroni-<br>dazole-<br>cepha-<br>lothin | N/R | Good |
|                     | 17 | N/R | N/R | Turkey | N/R  | N/R | N/R |  | N/R              | Ompha-<br>lus     | N/R | N/R                                                                                 | Ompha-<br>litis                             | N/R | N/R | Metroni-<br>dazole-<br>cepha-<br>lothin | N/R | Good |

1. Middleton, B.; Morris, P.; Carapetis, J. Invasive group A streptococcal infection in the Northern Territory, Australia: case report and review of the literature. *Journal of paediatrics and child health* **2014**, *50*, 869-873, doi:10.1111/jpc.12659.
2. Crum, N.F.; Chun, H.M.; Gaylord, T.G.; Hale, B.R. Group A streptococcal toxic shock syndrome developing in the third trimester of pregnancy. *Infectious diseases in obstetrics and gynecology* **2002**, *10*, 209-216, doi:10.1155/s1064744902000248.
3. Mahieu, L.M.; Holm, S.E.; Goossens, H.J.; Van Acker, K.J. Congenital streptococcal toxic shock syndrome with absence of antibodies against streptococcal pyrogenic exotoxins. *The Journal of pediatrics* **1995**, *127*, 987-989, doi:10.1016/s0022-3476(95)70045-5.
4. Nieburg, P.I.; Williams, M.L. Group A beta hemolytic streptococcal sepsis in mother and infant twins. *The Journal of pediatrics* **1975**, *87*, 453, doi:10.1016/s0022-3476(75)80659-7.



5. Lequier, L.; Vaudry, W.L. Puerperal fever and neonatal pleural empyema and bacteremia caused by group A streptococcus. *The Canadian journal of infectious diseases = Journal canadien des maladies infectieuses* **1998**, *9*, 185-188, doi:10.1155/1998/470984.
6. Shinoda, Y.; Hori, T.; Sasai, H.; Ikebe, T.; Ohnishi, H. Neonatal bacteremia caused by emm type 80 group A Streptococcus: A case report. *Pediatrics international : official journal of the Japan Pediatric Society* **2020**, *62*, 1305-1306, doi:10.1111/ped.14349.
7. Verboon-Maciolek, M.A.; Krediet, T.G.; van Erbruggen, I.; Gerards, L.J.; Fleer, A. Severe neonatal group A streptococcal disease. *European journal of pediatrics* **2000**, *159*, 450-452, doi:10.1007/s004310051305.
8. Nohara, F.; Nagaya, K.; Asai, H.; Tsuchida, E.; Okamoto, T.; Hayashi, T.; Sakata, H.; Terao, Y.; Azuma, H. Neonatal pleural empyema caused by emm type 6 group A streptococcus. *Pediatrics international : official journal of the Japan Pediatric Society* **2013**, *55*, 519-521, doi:10.1111/ped.12061.
9. Miyairi, I.; Berlingieri, D.; Protic, J.; Belko, J. Neonatal invasive group A streptococcal disease: case report and review of the literature. *The Pediatric infectious disease journal* **2004**, *23*, 161-165, doi:10.1097/01.inf.0000109887.40636.07.
10. Nutman, J.; Henig, E.; Wilunsky, E.; Reisner, S.H. Acute necrotising fasciitis due to streptococcal infection in a newborn infant. *Archives of disease in childhood* **1979**, *54*, 637-639, doi:10.1136/ad.54.8.637.
11. Thaarup, J.; Ellermann-Eriksen, S.; Stjernholm, J. Neonatal pleural empyema with group A Streptococcus. *Acta paediatrica (Oslo, Norway : 1992)* **1997**, *86*, 769-771, doi:10.1111/j.1651-2227.1997.tb08585.x.
12. Ross, L.; Tong, J. Concurrent neonatal and maternal sepsis due to invasive group A Streptococcus infection within 48 hours of birth. *Journal of paediatrics and child health* **2021**, *57*, 1698-1700, doi:10.1111/jpc.15357.
13. Sakata, H. Susceptibility and emm type of Streptococcus pyogenes isolated from children with severe infection. *Journal of infection and chemotherapy : official journal of the Japan Society of Chemotherapy* **2013**, *19*, 1042-1046, doi:10.1007/s10156-013-0617-6.
14. Sakata, H. Pediatric invasive streptococcal infection in northern and eastern regions of Hokkaido, Japan from 2010 to 2012. *Pediatrics international : official journal of the Japan Pediatric Society* **2014**, *56*, 360-363, doi:10.1111/ped.12250.
15. Timmis, A.; Parkins, K.; Kustos, I.; Riordan, F.A.; Efstratiou, A.; Carrol, E.D. Invasive group A streptococcal infections in children presenting to a paediatric intensive care unit in the North West of England. *The Journal of infection* **2010**, *60*, 183-186, doi:10.1016/j.jinf.2009.12.001.
16. Barnham, M.R.; Weightman, N.C. Bacteraemic Streptococcus pyogenes infection in the peri-partum period: now a rare disease and prior carriage by the patient may be important. *The Journal of infection* **2001**, *43*, 173-176, doi:10.1053/jinf.2001.0887.
17. Ventura, A.; Rúbio, C.; Rodrigues, D.; Silva, I.; Peres, A.; Cunha, F. Late-onset neonatal sepsis caused by group A Streptococcus - an unlikely agent. *NASCE E CRESCER - BIRTH AND GROWTH MEDICAL JOURNAL* **2019**, *28*, 26-29, doi:10.25753/BirthGrowthMJ.v28.i1.14558.
18. Saito, R.; Kerr-Liddell, R.; Paul, S.P. Late onset neonatal sepsis caused by group A streptococcus. *British journal of hospital medicine (London, England : 2005)* **2017**, *78*, 170-171, doi:10.12968/hmed.2017.78.3.170.
19. Huber, B.M. Cellulitis-adenitis in a neonate with group a streptococcal sepsis. *Klinische Padiatrie* **2014**, *226*, 82-83, doi:10.1055/s-0033-1363255.

20. Bhutta, Z.A.; Naqvi, S.H. Neonatal group A streptococcal septicemia. *The Pediatric infectious disease journal* **1990**, *9*, 528-529, doi:10.1097/00006454-199007000-00021.
21. Campbell, J.R.; Arango, C.A.; Garcia-Prats, J.A.; Baker, C.J. An outbreak of M serotype 1 group A Streptococcus in a neonatal intensive care unit. *The Journal of pediatrics* **1996**, *129*, 396-402.
22. Wilschanski, M.; Faber, J.; Abramov, A.; Isacsohn, M.; Erlichman, M. Neonatal septicemia caused by group A beta-hemolytic Streptococcus. *The Pediatric infectious disease journal* **1989**, *8*, 536-537, doi:10.1097/00006454-198908000-00015.
23. Cartwright, R.Y. Neonatal septicaemia due to group A beta-haemolytic streptococcus. *British medical journal* **1977**, *1*, 146-147, doi:10.1136/bmj.1.6054.146.
24. Barnham, M. Invasive streptococcal infections in the era before the acquired immune deficiency syndrome: a 10 years' compilation of patients with streptococcal bacteraemia in North Yorkshire. *The Journal of infection* **1989**, *18*, 231-248, doi:10.1016/s0163-4453(89)80059-3.
25. Umadevi, S.; Kali, A.; Sreenivasan, S.; Pramodhini, S.; Charles, M.V. Septic Arthritis caused by Group A Streptococcus in Newborn: An Unusual Presentation. *Journal of clinical and diagnostic research : JCDR* **2013**, *7*, 1143-1144, doi:10.7860/jcdr/2013/4852.3034.
26. Coulter, J.B.; Buchannon, C.R.; Vellodi, A.; Hart, C.A.; Sills, J.A. Group-A streptococcal infection in the newborn. *Lancet (London, England)* **1984**, *2*, 355-356, doi:10.1016/s0140-6736(84)92727-2.
27. Martic, J.; Mijac, V.; Jankovic, B.; Sekulovic, L.K.; Vasiljevic, Z.; Vuksanovic, J. Neonatal cellulitis and sepsis caused by group A streptococcus. *Pediatric dermatology* **2010**, *27*, 528-530, doi:10.1111/j.1525-1470.2010.01262.x.
28. Santos, M.S.; Ribeiro, G.S.; Oliveira, T.Q.; Santos, R.C.; Gouveia, E.; Salgado, K.; Takahashi, D.; Fontes, C.; Campos, L.C.; Reis, M.G.; et al. Burden of group A streptococcal meningitis in Salvador, Brazil: report of 11 years of population-based surveillance. *International journal of infectious diseases : IJID : official publication of the International Society for Infectious Diseases* **2009**, *13*, 456-461, doi:10.1016/j.ijid.2008.09.006.
29. Shanks, G.D.; Anderson, R.T.; Lazoritz, S.; Hemming, V.G. Bilateral neonatal group A streptococcal hydrocele infection associated with maternal puerperal sepsis. *Pediatric infectious disease* **1986**, *5*, 107-108, doi:10.1097/00006454-198601000-00022.
30. Torres-Martínez, C.; Mehta, D.; Butt, A.; Levin, M. Streptococcus associated toxic shock. *Archives of disease in childhood* **1992**, *67*, 126-130, doi:10.1136/ad.67.1.126.
31. Givner, L.B.; Abramson, J.S.; Wasilauskas, B. Apparent increase in the incidence of invasive group A beta-hemolytic streptococcal disease in children. *The Journal of pediatrics* **1991**, *118*, 341-346, doi:10.1016/s0022-3476(05)82144-4.
32. Johnson, M.P.; Rand, K.H. Group A beta-hemolytic streptococcal bacteremia and HIV infection. *Southern medical journal* **1990**, *83*, 146-149, doi:10.1097/00007611-199002000-00004.
33. Lehtonen, O.P.; Kero, P.; Ruuskanen, O.; Gaworzewska, E.T.; Hollo, O.; Erkkola, R.; Salmi, T. A nursery outbreak of group A streptococcal infection. *The Journal of infection* **1987**, *14*, 263-270, doi:10.1016/s0163-4453(87)93585-7.

34. Leonard, A.; Wright, A.; Saavedra-Campos, M.; Lamagni, T.; Cordery, R.; Nicholls, M.; Domoney, C.; Sriskandan, S.; Balasegaram, S. Severe group A streptococcal infections in mothers and their newborns in London and the South East, 2010-2016: assessment of risk and audit of public health management. *BJOG : an international journal of obstetrics and gynaecology* **2019**, *126*, 44-53, doi:10.1111/1471-0528.15415.
35. Siti Hafsyah, M.H.; Ibrahim, N.R.; Noraida, R.; Ismail, A.A.; Anani Aila, M.Z.; Hajissa, K.; Zeehaida, M. Group A Streptococcus puerperal sepsis with invasive neonatal infection: A fatal case. *The Medical journal of Malaysia* **2021**, *76*, 731-733.
36. Davey, C.; Moore, A.M. Necrotizing fasciitis of the scalp in a newborn. *Obstetrics and gynecology* **2006**, *107*, 461-463, doi:10.1097/01.aog.0000164094.02571.77.
37. Pius, S.; Bello, M.; Galadima, G.B.; Ibrahim, H.A.; Yerima, S.T.; Ambe, J.P. Neonatal septicaemia, bacterial isolates and antibiogram sensitivity in Maiduguri North-Eastern Nigeria. *The Nigerian postgraduate medical journal* **2016**, *23*, 146-151, doi:10.4103/1117-1936.190340.
38. Wheeler, M.C.; Roe, M.H.; Kaplan, E.L.; Schlievert, P.M.; Todd, J.K. Outbreak of group A streptococcus septicemia in children. Clinical, epidemiologic, and microbiological correlates. *Jama* **1991**, *266*, 533-537.
39. Seale, A.C.; Davies, M.R.; Anampiu, K.; Morpeth, S.C.; Nyongesa, S.; Mwarumba, S.; Smeesters, P.R.; Efstratiou, A.; Karugutu, R.; Mturi, N.; et al. Invasive Group A Streptococcus Infection among Children, Rural Kenya. *Emerging infectious diseases* **2016**, *22*, 224-232, doi:10.3201/eid2202.151358.
